# Supplementary material for: Role of Pre-Farrow Natural Planned Exposure of Gilts in Shaping the Passive Antibody Response to Rotavirus A in Piglets
Source: MDPI journal article supplement (doi:10.3390/vaccines11121866), 2023-12-18
Supplement: s1 [file s1]

**Table S1:** Longitudinal RVA detection levels in piglets' feces (5 piglets/litter) at multiple time points

| Study groups | Sow Id. | RVA Ct values detected in piglet feces at different time points |       |        |        |        |        |        |
|--------------|---------|-----------------------------------------------------------------|-------|--------|--------|--------|--------|--------|
|              |         | Day 0                                                           | Day 7 | Day 14 | Day 21 | Day 28 | Day 35 | Day 42 |
| Group 1      | 40399   |                                                                 |       |        |        | 13.04  | 34.81  | 15.24  |
|              | 38868   |                                                                 |       |        |        | 15.43  | 29.13  | 26.74  |
|              | 41031   |                                                                 |       |        |        | 12.19  | 26.67  | 22.36  |
|              | 41071   |                                                                 |       |        |        | 13.30  | 24.55  | 24.90  |
|              | 41049   |                                                                 | 16.09 | 20.96  | 27.13  | 12.80  | 26.96  | 25.13  |
|              | 41267   |                                                                 |       |        |        | 13.65  | 27.78  | 22.65  |
|              | 40973   |                                                                 |       |        |        | 14.18  | 24.94  | 25.30  |
|              | 40652   |                                                                 |       |        |        | 13.49  | 24.23  | 22.76  |
|              | 40956   |                                                                 |       |        |        | 12.89  | 28.50  | 19.85  |
|              | 41262   |                                                                 |       |        |        | 12.09  | 31.52  | 26.47  |
|              | 41144   |                                                                 |       |        |        | 14.45  | 26.20  | 22.38  |
|              | 41181   |                                                                 |       |        |        | 12.46  | 24.16  | 17.09  |
| Group 2      | 41289   |                                                                 |       |        |        | 13.55  | 28.64  | 23.47  |
|              | 41030   |                                                                 |       |        |        | 13.08  | 27.36  | 15.29  |
|              | 41052   |                                                                 |       |        |        | 14.64  | 21.15  | 24.51  |
|              | 40960   |                                                                 |       |        |        | 11.87  | 28.23  | 17.46  |
|              | 41011   |                                                                 |       |        |        | 15.22  | 22.52  | 22.07  |
|              | 40961   |                                                                 |       |        |        | 13.97  | 27.27  | 18.51  |
|              | 41010   |                                                                 |       |        |        | 12.85  | 24.88  | 21.92  |
|              | 40984   |                                                                 |       |        |        | 12.87  | 25.43  | 25.93  |
|              | 41069   |                                                                 |       |        |        | 13.12  | 23.03  | 19.57  |
|              | 41046   |                                                                 |       |        |        | 13.05  | 24.01  | 18.87  |
|              | 40954   |                                                                 |       |        |        | 13.68  | 23.72  | 17.61  |
|              | 41045   |                                                                 |       |        |        | 11.64  | 29.08  | 20.20  |
| Group 3      | 41009   |                                                                 |       |        |        | 12.52  | 29.28  | 16.36  |
|              | 41027   |                                                                 |       |        |        | 12.91  | 27.58  | 16.18  |
|              | 40975   |                                                                 |       |        |        | 11.61  | 25.14  | 18.60  |
|              | 40995   |                                                                 |       |        |        | 11.40  | 29.42  | 18.82  |
|              | 41004   |                                                                 |       |        |        | 12.76  | 30.99  | 21.15  |
|              | 40994   |                                                                 |       |        |        | 14.66  | 27.66  | 25.29  |
|              | 41062   |                                                                 |       |        |        | 13.25  | 27.23  | 14.29  |
|              | 41249   |                                                                 |       |        |        | 14.30  | 28.59  | 22.57  |
|              | 41285   |                                                                 |       |        |        | 12.45  | 24.04  | 16.47  |
|              | 40996   |                                                                 | 28.09 | 20.09  | 15.50  | 14.00  | 22.62  | 18.07  |
|              | 41219   |                                                                 |       |        |        | 14.28  | 31.01  | 16.63  |
| Group 4      | 40969   |                                                                 |       |        |        | 12.46  | 35.25  | 27.84  |

|       |       |       |       |
|-------|-------|-------|-------|
| 41112 | 14.52 | 27.77 | 24.55 |
| 41025 | 14.70 | 23.80 | 16.80 |
| 41014 | 14.02 | 21.91 | 17.15 |
| 41053 | 13.39 | 18.58 | 24.17 |
| 41070 | 14.12 | 27.94 | 19.68 |
| 41174 | 14.03 | 28.47 | 20.10 |
| 40964 | 13.89 | 29.02 | 20.49 |
| 40979 | 16.59 | 28.95 | 18.47 |
| 41026 |       | 27.74 | 16.37 |
| 41057 | 14.96 | 28.50 | 18.19 |
